# Supplementary material for: One-step hydrothermal preparation of Ce-doped MoO3 nanobelts with enhanced gas sensing properties
Source: Royal Society of Chemistry journal article supplement (doi:10.1039/c7ra02893h), 2017-01-01
Supplement: c7ra02893h1.pdf [file c7ra02893h1.pdf]

**Electronic Supplementary Material (ESI) for RSC Advances**

**This journal is @ The Royal Society of Chemistry 2017**

## **Supporting Information**

**One-step hydrothermal preparation of Ce-doped MoO<sub>3</sub>  
nanobelts with enhanced gas sensing properties**

**Zhuoqi Li, Weijie Wang, Zhicheng Zhao, Xinrong Liu, Peng Song\***

*School of Material Science and Engineering, University of Jinan, Jinan 250022, China*

\* To whom correspondence should be addressed. E-mail: mse\_songp@ujn.edu.cn (P. Song); Tel.: +86 531 82765473; fax: +86 531 87974453

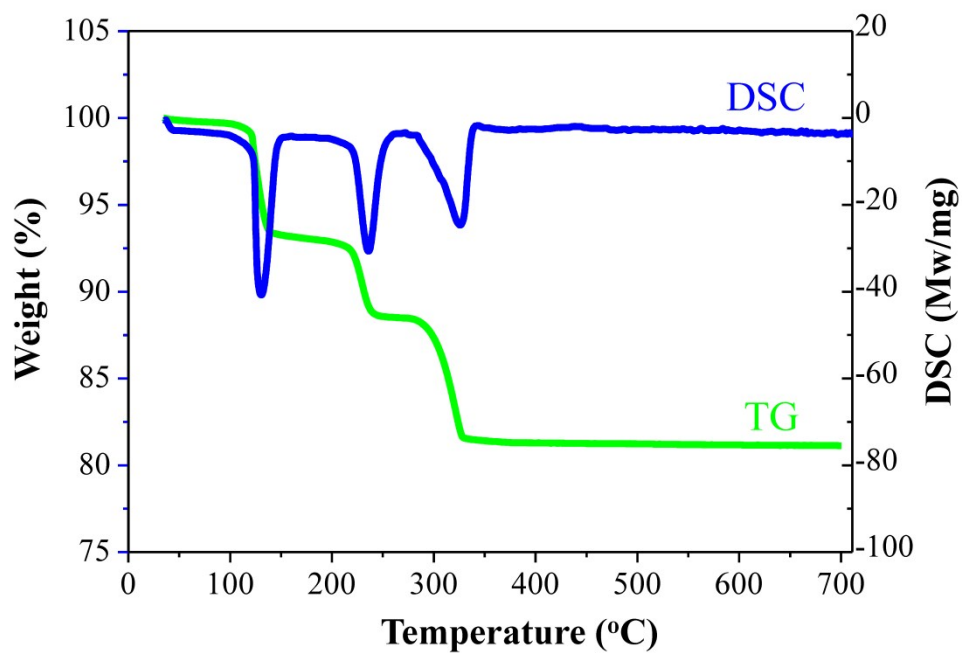

Fig. S1 TG-DSC curves of the conversion of  $(\text{NH}_4)_6\text{Mo}_7\text{O}_{24}\cdot 4\text{H}_2\text{O}$ .

The conversion of  $(\text{NH}_4)_6\text{Mo}_7\text{O}_{24}\cdot 4\text{H}_2\text{O}$  during annealing treatment was investigated by Thermogravimetric (TG) and differential scanning calorimetric (DSC) at a program-controlled temperature elevation rate of  $10\text{ }^\circ\text{C min}^{-1}$  in air. As shown in Fig. S1,  $\text{MoO}_3$  powders can be obtained by calcining  $(\text{NH}_4)_6\text{Mo}_7\text{O}_{24}\cdot 4\text{H}_2\text{O}$  when the temperature is over  $350\text{ }^\circ\text{C}$ .
